# Supplementary material for: Hytrel-like Copolymers Based on Furan Polyester: The Effect of Poly(Butylene Furanoate) Segment on Microstructure and Mechanical/Elastic Performance
Source: MDPI journal article supplement (doi:10.3390/molecules28072962), 2023-03-26
Supplement: s1 [file s1]

## Supporting Information

### HytreL-Like Copolymers Based on Furan Polyester: The Effect of Poly(Butylene Furanoate) Segment on Microstructure and Mechanical/Elastic Performance

Magdalena Kwiatkowska<sup>1,\*</sup>, Inez Kowalczyk<sup>1</sup>, Zbigniew Rozwadowski<sup>2</sup>, Elżbieta Piesowicz<sup>1</sup> and Anna Szymczyk<sup>3,\*</sup>

<sup>1</sup> Department of Materials Technology, West Pomeranian University of Technology in Szczecin, Piastow Av. 19, 70-310 Szczecin, Poland

<sup>2</sup> Department of Inorganic and Analytical Chemistry, West Pomeranian University of Technology in Szczecin, Piastow Av. 42, 71-065 Szczecin, Poland

<sup>3</sup> Department of Physics, West Pomeranian University of Technology in Szczecin, Piastow Av. 17, 70-310 Szczecin, Poland

\* Correspondence: magdalena.kwiatkowska@zut.edu.pl (M.K.); anna.szymczyk@zut.edu.pl (A.S.); Tel.: +48-91-449-45-89 (M.K.); +48-91-449-41-73 (A.S.)

Figure S1

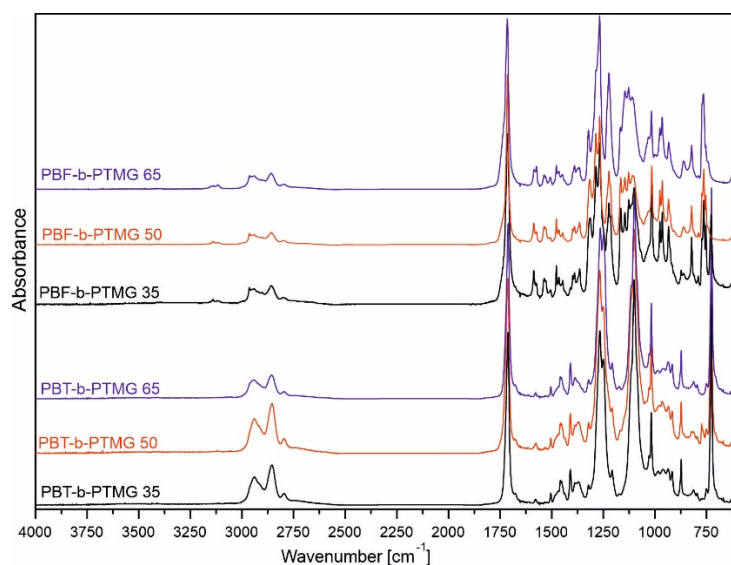

FIGURE S1. FTIR spectra of all investigated copolymers

Figure S2

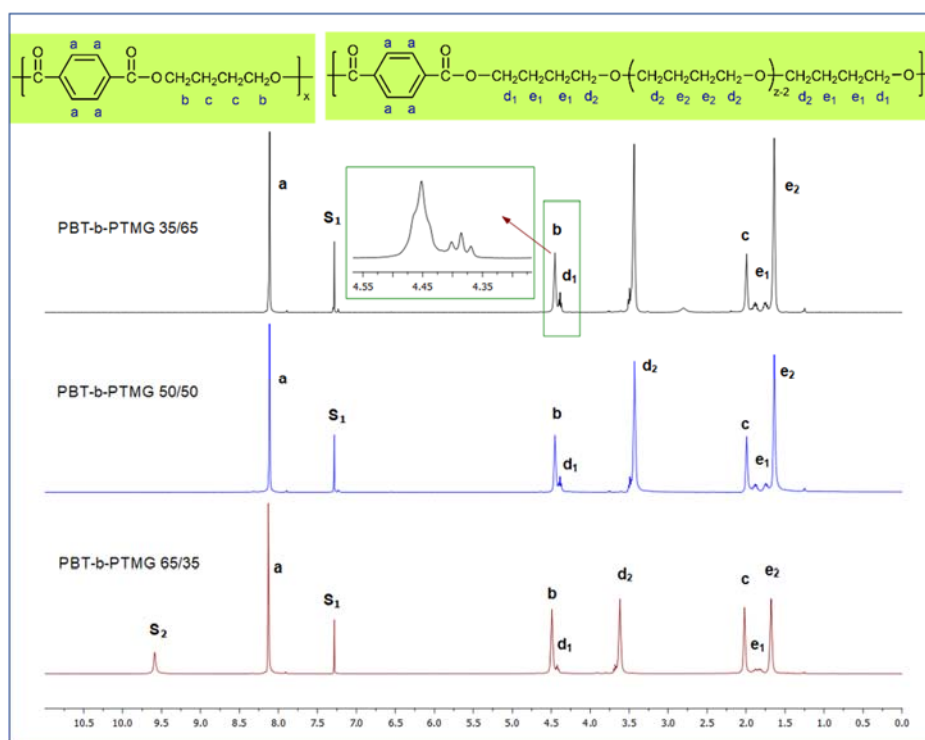

**FIGURE S2.**  $^1\text{H}$ -NMR spectra of PBT-*b*-PTMG copolymers in  $\text{CDCl}_3$  ( $s_1$ ) + drops of  $\text{CF}_3\text{COOD}$  ( $s_2$ ).

The chemical composition of PBT-*b*-PTMG copolyesters was confirmed by  $^1\text{H}$ -NMR spectroscopy (Figure 2S). The peaks at position of 3.62 ppm (peak  $d_2$ ,  $-\text{OCH}_2\text{-CH}_2\text{-CH}_2\text{-CH}_2\text{O}-$ ) and 1.64 ppm (peak  $e_2$ ,  $-\text{OCH}_2\text{-CH}_2\text{-CH}_2\text{-CH}_2\text{O}-$ ) are assigned to the protons from PTMG flexible blocks, while the peaks at 8.11 ppm (peak  $a$ , aromatic protons), 4.45 ppm (peak  $b$ ,  $-\text{COO-CH}_2\text{-CH}_2\text{-CH}_2\text{-CH}_2\text{-OOC-}$ ) and 1.99 ppm (peak  $c$ ,  $-\text{COO-CH}_2\text{-CH}_2\text{-CH}_2\text{-CH}_2\text{-OOC-}$ ) to the protons from PBT rigid segments, respectively. At 4.39 ppm (peak  $d_1$ ) and at 1.88 ppm (peak  $e_1$ ). The peaks at 4.39 ppm ( $d_1$ ) is and at 1.88 ppm ( $e_1$ ) corresponds to the flexible PTMG blocks ends connected with terephthalate unit of the PBT segment.

The real fractions of the PTMG segments (**Table S1**) in copolymers were calculated based on the characteristic peaks' integral intensities, according to Equation (S1):

$$W_{\text{PTMG}}(\text{wt}\%) = \frac{\left(\frac{I_{e1}}{4} \times 88\right) + \left(\frac{I_{e2}}{4} \times 72\right)}{\left(\frac{I_a}{4} \times 220\right) + \left(\frac{I_{e2}}{4} \times 72\right)} 100\% \quad (\text{S1})$$

where:  $I_a$ ,  $I_{e1}$ , and  $I_{e2}$  are the integral intensities of  $a$ ,  $e_1$  and  $e_2$  resonances on  $^1\text{H}$ -NMR spectra, whilst 220, 72, and 88 are the molecular weights of repeating units in PBT and PTMG blocks, respectively.

**Table S1.** The chemical composition and molecular weights of PBT- *b*-PTMG copolymers.

| Sample                 | In feed                |                          |                           | <sup>1</sup> H-NMR |                |                |                 |                 |                 |                 |                          |                           |
|------------------------|------------------------|--------------------------|---------------------------|--------------------|----------------|----------------|-----------------|-----------------|-----------------|-----------------|--------------------------|---------------------------|
|                        | DP <sub>x</sub><br>mol | W <sub>PBT</sub><br>wt % | W <sub>PTMG</sub><br>wt % | I <sub>a</sub>     | I <sub>b</sub> | I <sub>c</sub> | I <sub>d1</sub> | I <sub>d2</sub> | I <sub>e1</sub> | I <sub>e2</sub> | W <sub>PBT</sub><br>wt % | W <sub>PTMG</sub><br>wt % |
| PBT- <i>b</i> -PTMG 65 | 9.54                   | 65                       | 35                        | 1.00               | 1.00           | 0.97           | 0.11            | 1.21            | 0.26            | 1.12            | <b>65.56</b>             | <b>34.44</b>              |
| PBT- <i>b</i> -PTMG 50 | 5.14                   | 50                       | 50                        | 1.00               | 0.92           | 0.90           | 0.21            | 2.38            | 0.23            | 2.57            | <b>49.59</b>             | <b>50.41</b>              |
| PBT- <i>b</i> -PTMG 35 | 2.77                   | 35                       | 65                        | 1.00               | 0.80           | 0.83           | 0.25            | 3.22            | 0.55            | 3.26            | <b>38.10</b>             | <b>61.90</b>              |

DP<sub>x</sub> – degree of polymerization of PBT block,  $W_{\text{PTMG}}$  – weight content of flexible block,  $W_{\text{PBT}}$  – weight content of rigid blocks

Figure S3

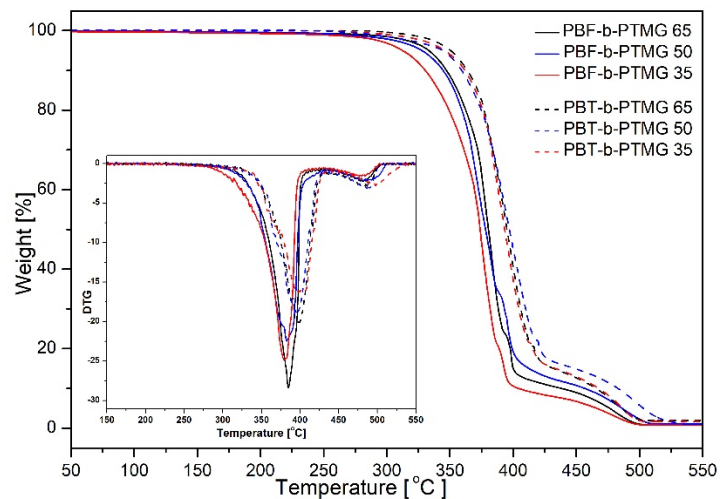

**FIGURE S3.** TGA thermograms of PBF and PBT copolymers received for samples subjected to thermo – oxidative atmosphere

Figure S4

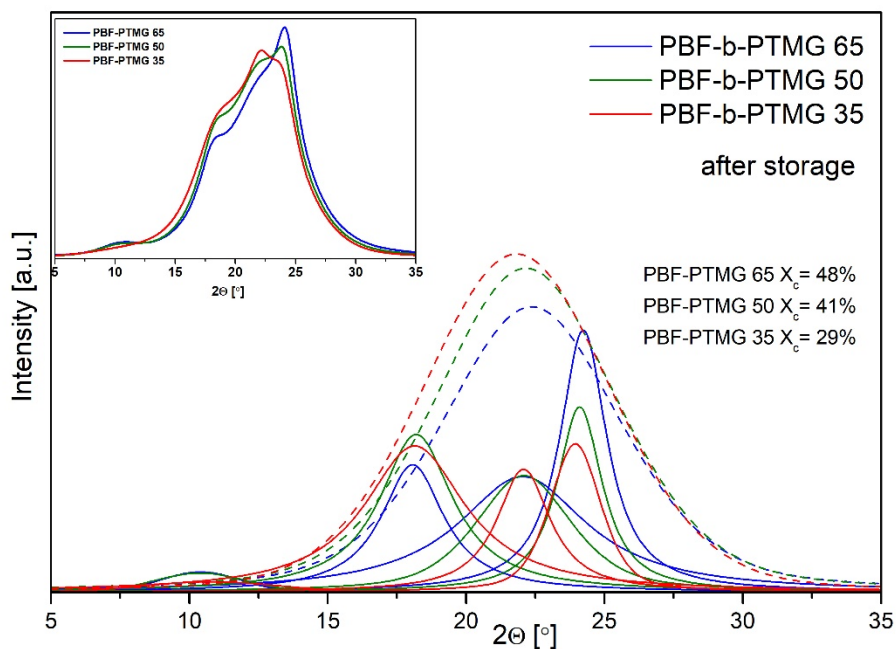

**FIGURE S4.** WAXS diffractograms of PBF-b-PTMG injected samples received after four weeks of storage with calculated crystallinity degrees.

Figure S5

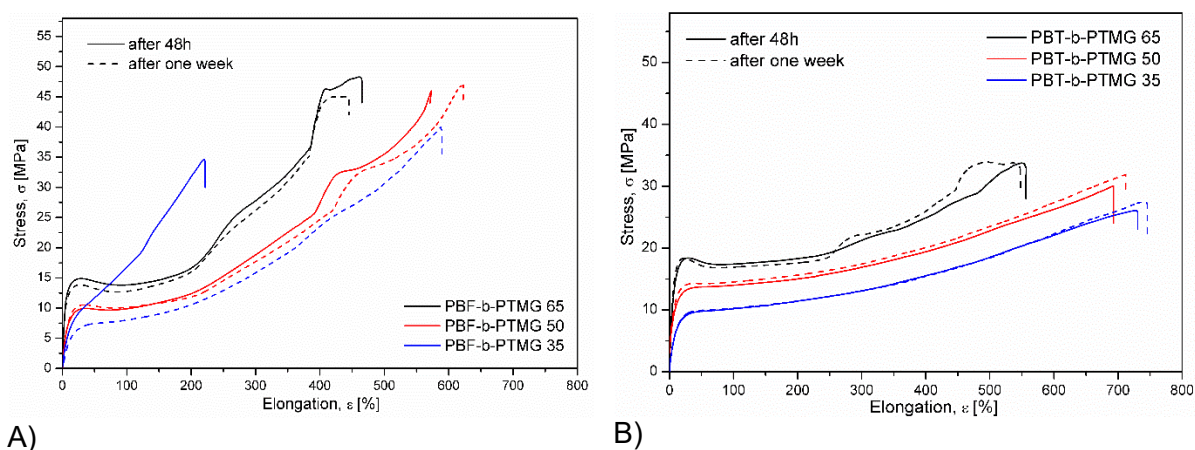

**FIGURE S5.** The representative uniaxial stress – strain plots of A) PBF and B) PBT copolymers tested in 48h and after one week from processing

**Table S2.** Mechanical parameters of PBF and PBT copolymers in 48h and one week after injection molding

|               | After 48h   |                     |            |                     | After one week |                     |            |                     |
|---------------|-------------|---------------------|------------|---------------------|----------------|---------------------|------------|---------------------|
| Sample        | Rm<br>[MPa] | $\epsilon_b$<br>[%] | E<br>[MPa] | $\sigma_y$<br>[MPa] | Rm<br>[MPa]    | $\epsilon_b$<br>[%] | E<br>[MPa] | $\sigma_y$<br>[MPa] |
| PBF-b-PTMG 65 | 48.1 ± 0.9  | 487 ± 46            | 217 ± 58   | 14.8 ± 0.1          | 44.7 ± 1.1     | 468 ± 48            | 143 ± 33   | 14.2 ± 0.4          |
| PBF-b-PTMG 50 | 45.1 ± 5.0  | 576 ± 18            | 111 ± 25   | 9.9 ± 0.1           | 47.8 ± 3.5     | 645 ± 50            | 79 ± 12    | 10.5 ± 0.2          |
| PBF-b-PTMG 35 | 34.7 ± 2.0  | 230 ± 24            | 103 ± 24   | 9.6 ± 0.3           | 41.1 ± 1.0     | 597 ± 59            | 86 ± 24    | 7.5 ± 0.1           |
| PBT-b-PTMG 65 | 33.8 ± 0.3  | 556 ± 36            | 296 ± 64   | 18.3 ± 0.1          | 34.4 ± 0.9     | 560 ± 38            | 287 ± 50   | 18.6 ± 0.1          |
| PBT-b-PTMG 50 | 31.3 ± 0.6  | 692 ± 34            | 171 ± 29   | 13.7 ± 0.1          | 32.3 ± 0.6     | 712 ± 33            | 135 ± 10   | 14.2 ± 0.1          |
| PBT-b-PTMG 35 | 25.1 ± 2.7  | 669 ± 69            | 133 ± 25   | 9.7 ± 0.1           | 25.4 ± 2.6     | 713 ± 84            | 79 ± 6     | 9.3 ± 0.4           |

Figure S6

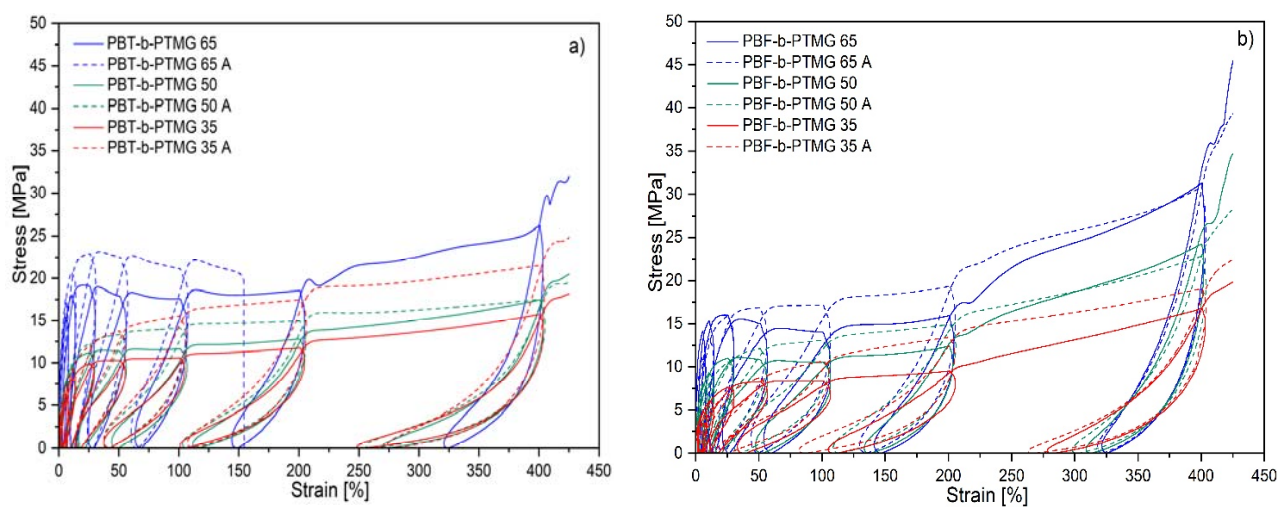

**FIGURE S6.** The cyclic stress – strain paths for PBT (a) and PBF (b) copolymers. Samples after one month of storage. Dash lines refer to annealed samples.
